# Supplementary material for: Report on Vincristine-Producing Endophytic Fungus Nigrospora zimmermanii from Leaves of Catharanthus roseus
Source: MDPI journal article supplement (doi:10.3390/metabo12111119), 2022-11-15
Supplement: s1 [file s1]

**Table S1.** GenBank accessions of the sequence analysis.

| Description                                                                         | Per. ident | Acc. Len | Accession                   |
|-------------------------------------------------------------------------------------|------------|----------|-----------------------------|
| <i>Nigrospora zimmermanii</i> CBS 290.62 ITS region; from TYPE material             | 99.24      | 549      | <a href="#">NR_153485.1</a> |
| <i>Nigrospora pyriformis</i> CGMCC 3.18122 ITS region; from TYPE material           | 97.52      | 540      | <a href="#">NR_153469.1</a> |
| <i>Nigrospora vesicularifera</i> CGMCC 3.19333 ITS region; from TYPE material       | 97.14      | 528      | <a href="#">NR_165927.1</a> |
| <i>Nigrospora sacchari-officinarum</i> CGMCC 3.19335 ITS region; from TYPE material | 96.58      | 536      | <a href="#">NR_165926.1</a> |
| <i>Nigrospora hainanensis</i> CGMCC 3.18129 ITS region; from TYPE material          | 96.59      | 533      | <a href="#">NR_153480.1</a> |
| <i>Nigrospora aurantiaca</i> CGMCC 3.18130 ITS region; from TYPE material           | 96.76      | 526      | <a href="#">NR_153477.1</a> |
| <i>Nigrospora camelliae-sinensis</i> CGMCC 3.18125 ITS region; from TYPE material   | 97.46      | 511      | <a href="#">NR_153473.1</a> |
| <i>Nigrospora vesicularis</i> CGMCC 3.18128 ITS region; from TYPE material          | 96.38      | 526      | <a href="#">NR_153479.1</a> |
| <i>Nigrospora guilinensis</i> CGMCC 3.18124 ITS region; from TYPE material          | 96.14      | 516      | <a href="#">NR_153472.1</a> |
| <i>Nigrospora bambusae</i> CGMCC 3.18327 ITS region; from TYPE material             | 96.23      | 482      | <a href="#">NR_153484.1</a> |

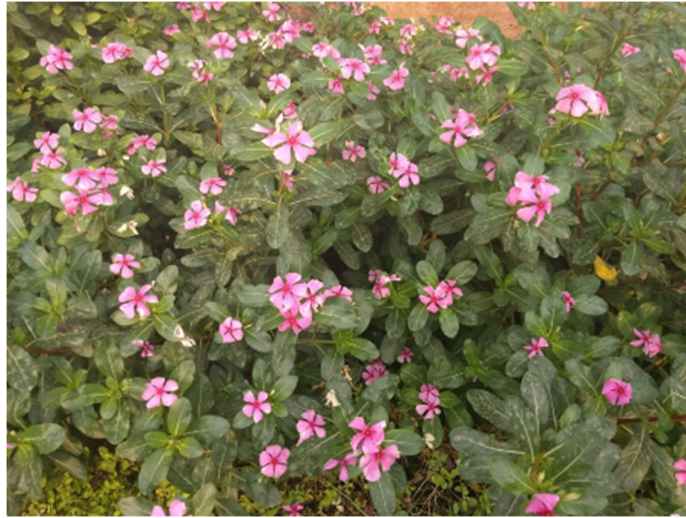

**Figure S1.** *Catharanthus roseus* (L.) G. Don habit.

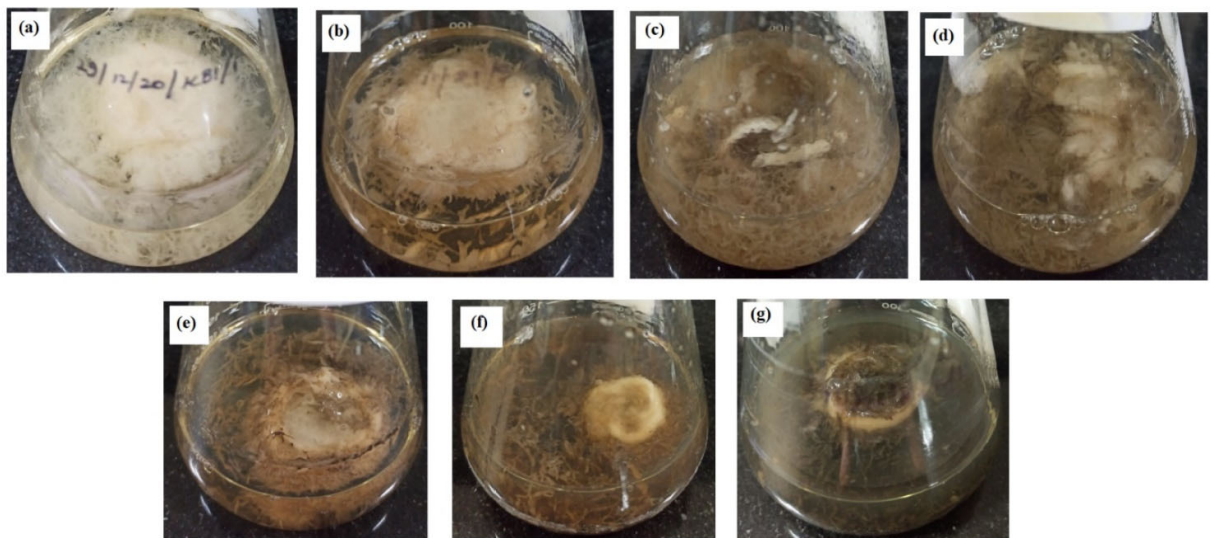

**Figure S2.** Eight-day suspension culture in PDB media; (a) Parent fungus [Generation 1]; (b) Generation 2; (c) Generation 3; (d) Generation 4; (e) Generation 5; (f) Generation 6; (g) Generation 7.

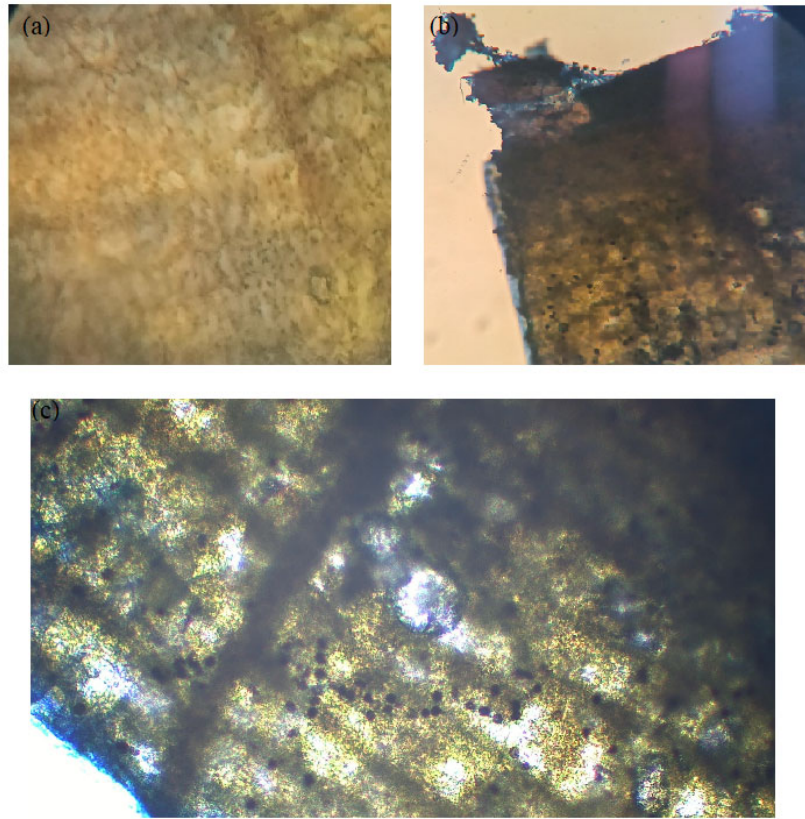

**Figure S3.** Colonization study: (a) Control leaf sample before infection (no endophytic spores or hypha visible under light microscope); (b) Mycelia oozing out of the leaf surface visible under the microscope at 100x magnification; (c) Spores (blue) visible under the microscope at 400x magnification inside the leaf-cutting of *Catharanthus roseus* stained with lactophenol cotton blue.

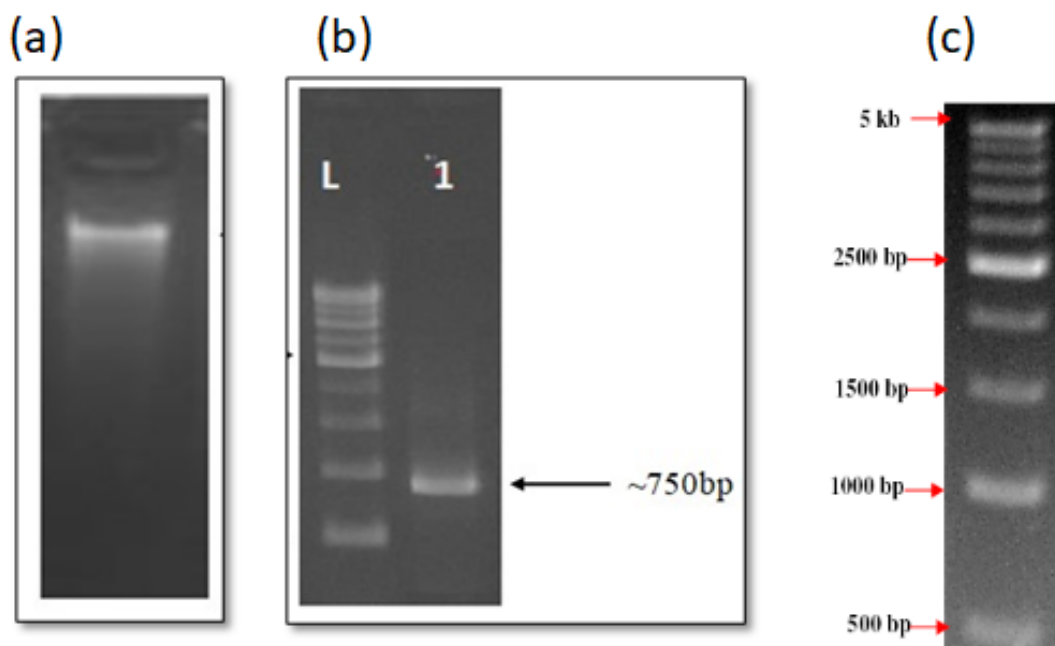

**Figure S4.** (a) gDNA isolated from fungus *Nigrospora zimmermanii* (b) Band for PCR product of ITS region at ~750bp (c) 500 bp ladder contains 10 DNA fragments of size 500 bp, 1000 bp, 1500 bp, 2000 bp, 2500 bp, 3000 bp, 3500 bp, 4000 bp, 4500 bp and 5000 bp.

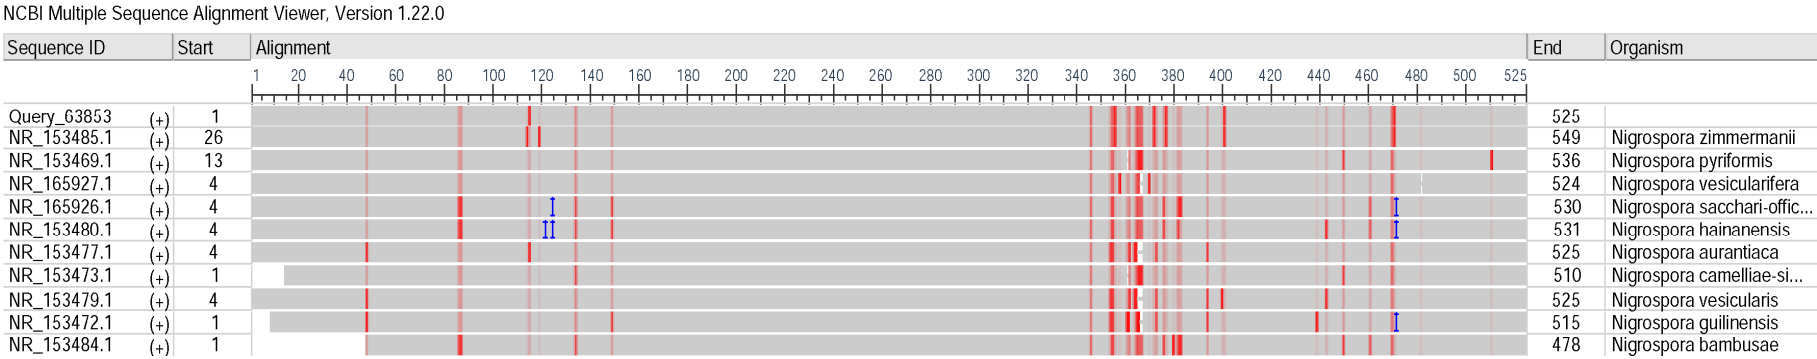

**Figure S5.** Sequences producing significant alignments data, generated by NCBI Multiple Sequence Alignment Viewer, Version 1.22.0.

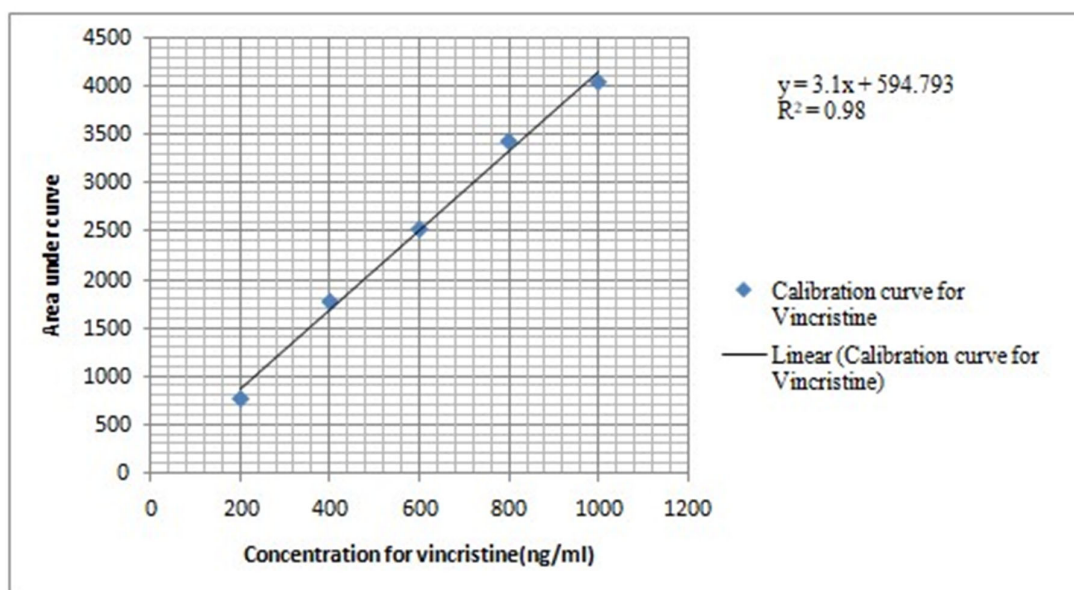

**Figure S6.** Calibration curve for vincristine standard.

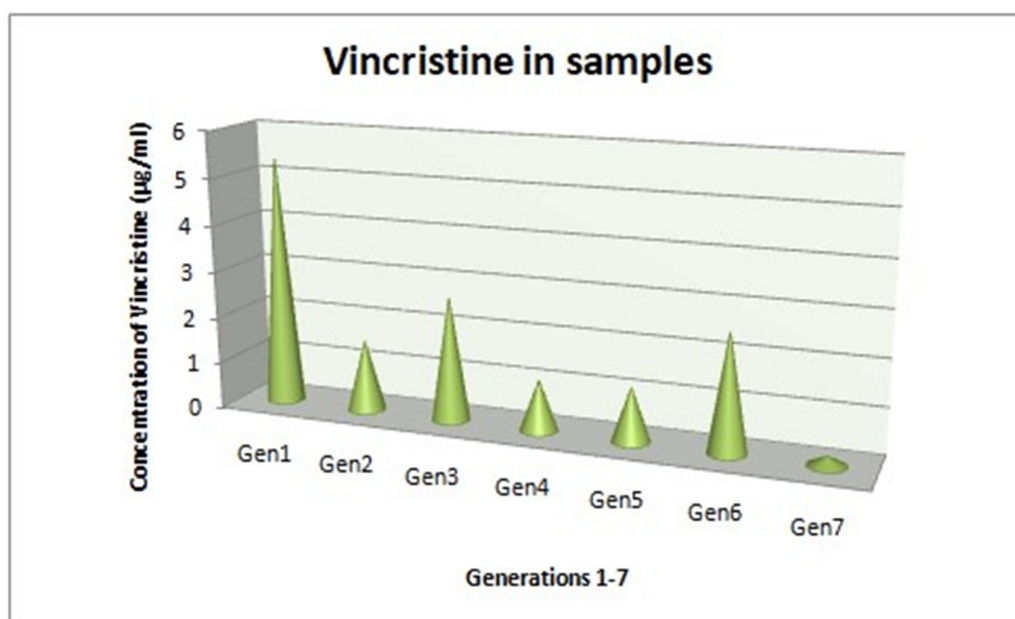

**Figure S7.** Graphical representation of the quantity of vincristine in samples from Generation 1 to 7.
